# Supplementary material
Source: PubMed Central journal article supplement (PMC6641597)
Supplement: ao7b00970_si_001.pdf [file ao7b00970_si_001.pdf]

Supporting information for

## Sulfurization of H-phosphonate diesters by elemental sulfur under aqueous conditions

Tuomas Lönnberg\*

Department of Chemistry, University of Turku, 20014 Turku, Finland

Email: [tuanol@utu.fi](mailto:tuanol@utu.fi)

### Contents

|                                                                                                                                   |     |
|-----------------------------------------------------------------------------------------------------------------------------------|-----|
| <b>Figure S1</b> $^1\text{H}$ NMR spectrum of bis(2',3'- <i>O</i> -methyleneadenosin-5'-yl)-H-phosphonate ( <b>1h</b> )           | S2  |
| <b>Figure S2</b> $^{13}\text{C}$ NMR spectrum of bis(2',3'- <i>O</i> -methyleneadenosin-5'-yl)-H-phosphonate ( <b>1h</b> )        | S6  |
| <b>Figure S3</b> $^{31}\text{P}$ NMR spectrum of bis(2',3'- <i>O</i> -methyleneadenosin-5'-yl)-H-phosphonate ( <b>1h</b> )        | S9  |
| <b>Figure S4</b> $^1\text{H}$ NMR spectrum of 2',3'- <i>O</i> -methyleneadenosine-5'-H-phosphonate ( <b>3h</b> )                  | S10 |
| <b>Figure S5</b> $^{13}\text{C}$ NMR spectrum of 2',3'- <i>O</i> -methyleneadenosine-5'-H-phosphonate ( <b>3h</b> )               | S16 |
| <b>Figure S6</b> $^{31}\text{P}$ NMR spectrum of 2',3'- <i>O</i> -methyleneadenosine-5'-H-phosphonate ( <b>3h</b> )               | S20 |
| <b>Table S1</b> Observed rate constants for the hydrolysis of <b>1h</b> in the presence of 3.0 mg of sublimed elemental sulfur    | S21 |
| <b>Table S2</b> Observed rate constants for the sulfurization of <b>1h</b> in the presence of 3.0 mg of sublimed elemental sulfur | S22 |

SpinWorks 4:

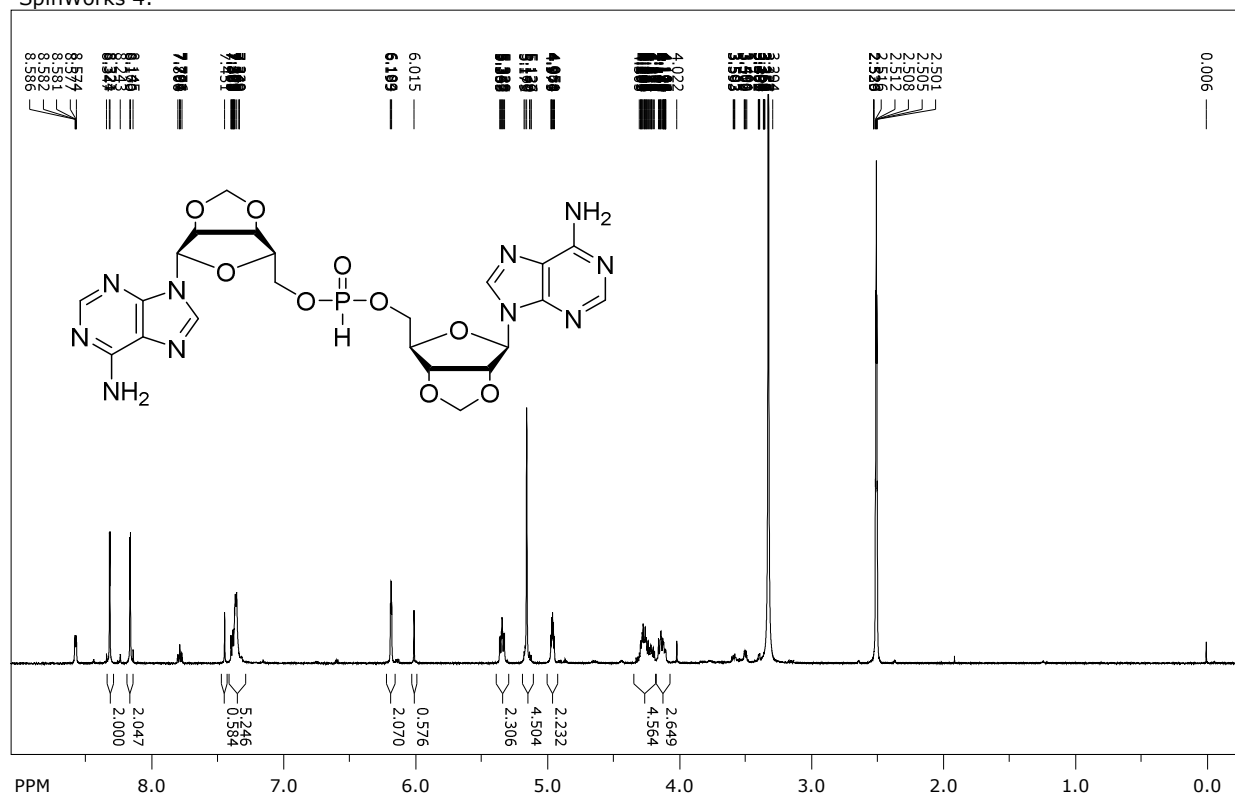

file: ...tuanlo\NMR Data\TL311\_010716\1\fid exp: <zg30>  
transmitter freq.: 500.083088 MHz  
time domain size: 65536 points  
width: 10000.00 Hz = 19.9967 ppm = 0.152588 Hz/pt  
number of scans: 16

freq. of 0 ppm: 500.080000 MHz  
processed size: 65536 complex points  
LB: 0.000 GF: 0.0000

Figure S1 <sup>1</sup>H NMR spectrum of bis(2',3'-O-methyleneadenosin-5'-yl)-H-phosphonate (1h)

SpinWorks 4:

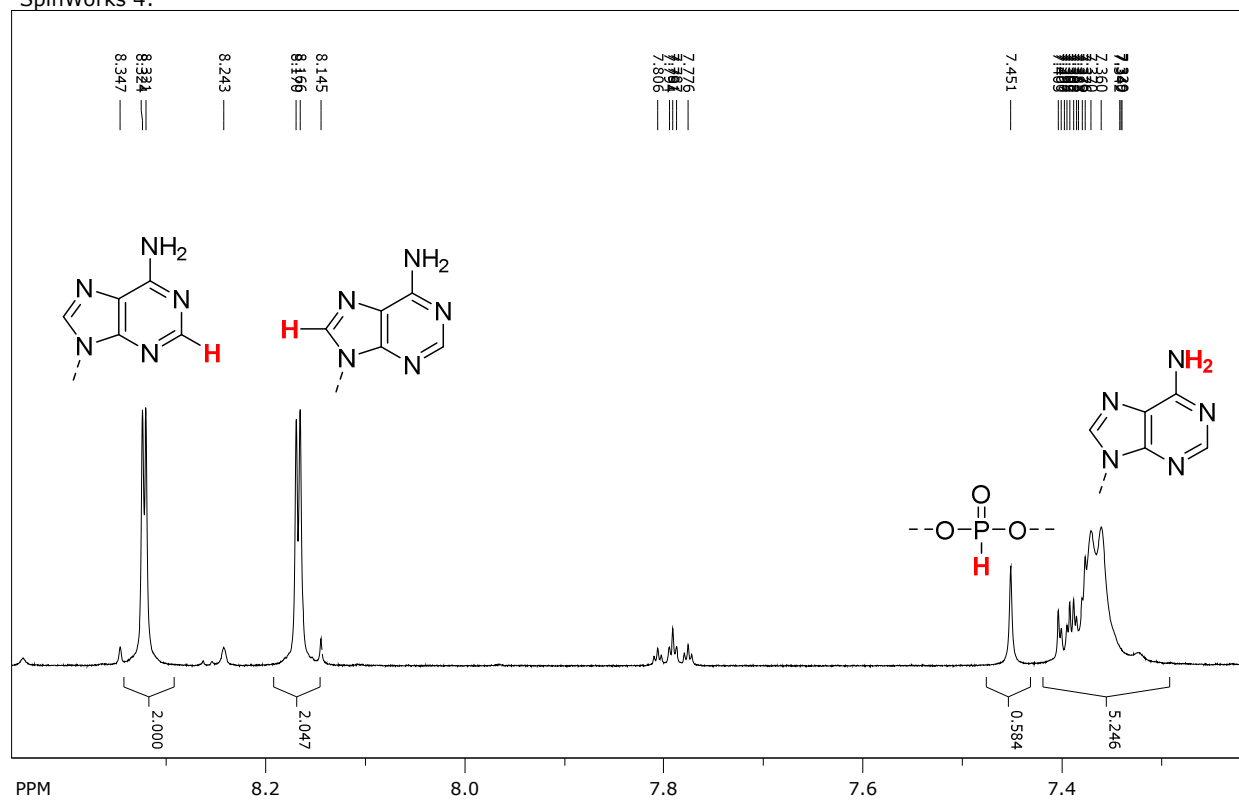

file: ...tuanio\NMR Data\TL311\_010716\1\fid exp: <zg30>  
transmitter freq.: 500.083088 MHz  
time domain size: 65536 points  
width: 10000.00 Hz = 19.9967 ppm = 0.152588 Hz/pt  
number of scans: 16

freq. of 0 ppm: 500.080000 MHz  
processed size: 65536 complex points  
LB: 0.000 GF: 0.0000

**Figure S1**  $^1\text{H}$  NMR spectrum of bis(2',3'-O-methyleneadenosin-5'-yl)-H-phosphonate (**1h**) (continued)

SpinWorks 4:

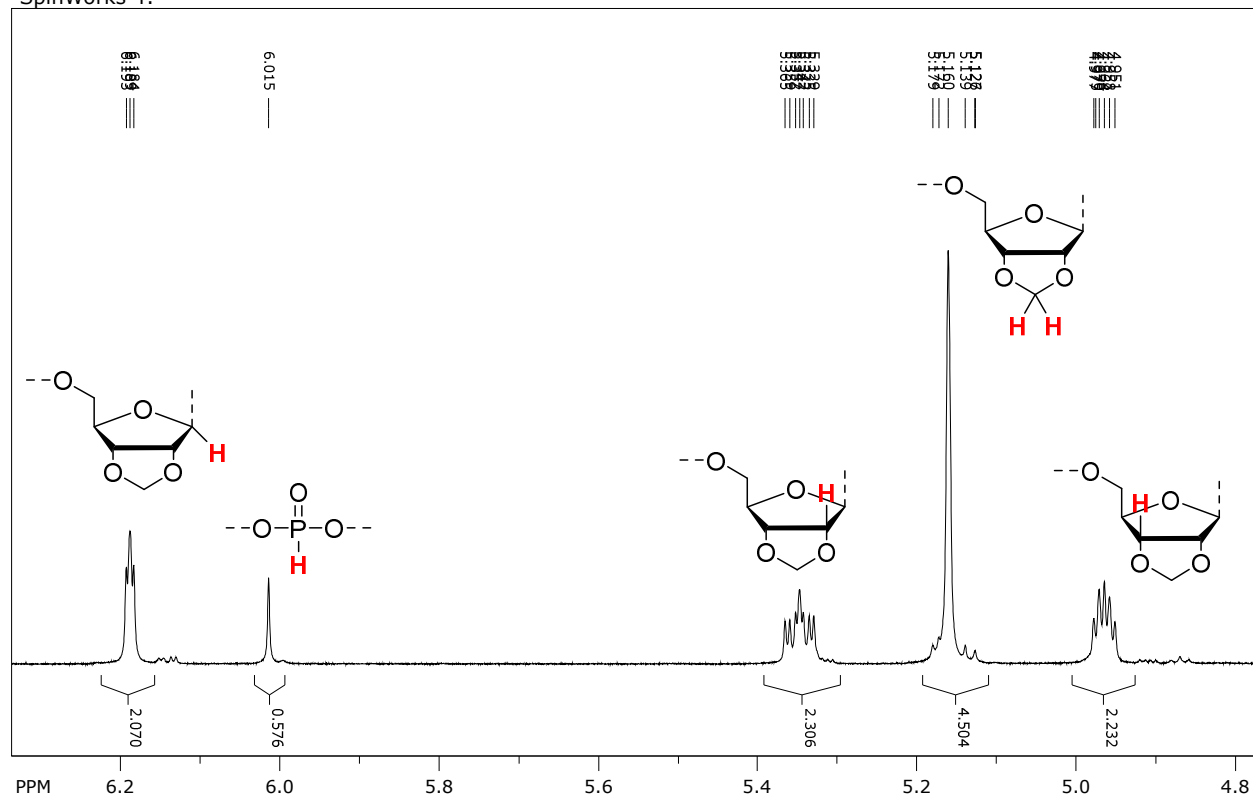

file: ...tuanio\NMR Data\TL311\_010716\1\fid expt: <zg30>  
transmitter freq.: 500.083088 MHz  
time domain size: 65536 points  
width: 10000.00 Hz = 19.9967 ppm = 0.152588 Hz/pt  
number of scans: 16

freq. of 0 ppm: 500.080000 MHz  
processed size: 65536 complex points  
LB: 0.000 GF: 0.0000

**Figure S1** <sup>1</sup>H NMR spectrum of bis(2',3'-O-methyleneadenosin-5'-yl)-H-phosphonate (**1h**) (continued)

SpinWorks 4:

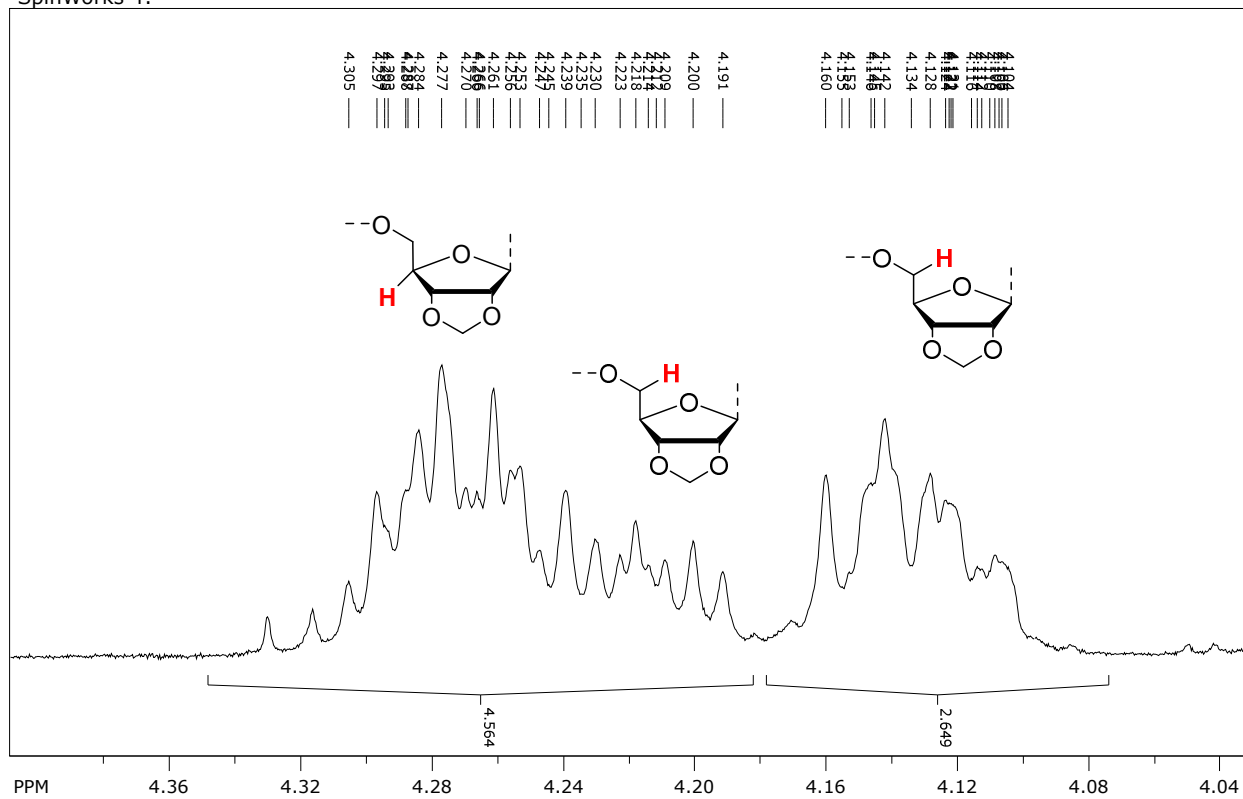

file: ...tuanio\NMR Data\TL311\_010716\1\fid exp: <zg30>  
transmitter freq.: 500.083088 MHz  
time domain size: 65536 points  
width: 10000.00 Hz = 19.9967 ppm = 0.152588 Hz/pt  
number of scans: 16

freq. of 0 ppm: 500.080000 MHz  
processed size: 65536 complex points  
LB: 0.000 GF: 0.0000

**Figure S1** <sup>1</sup>H NMR spectrum of bis(2',3'-O-methyleneadenosin-5'-yl)-H-phosphonate (**1h**) (continued)

SpinWorks 4:

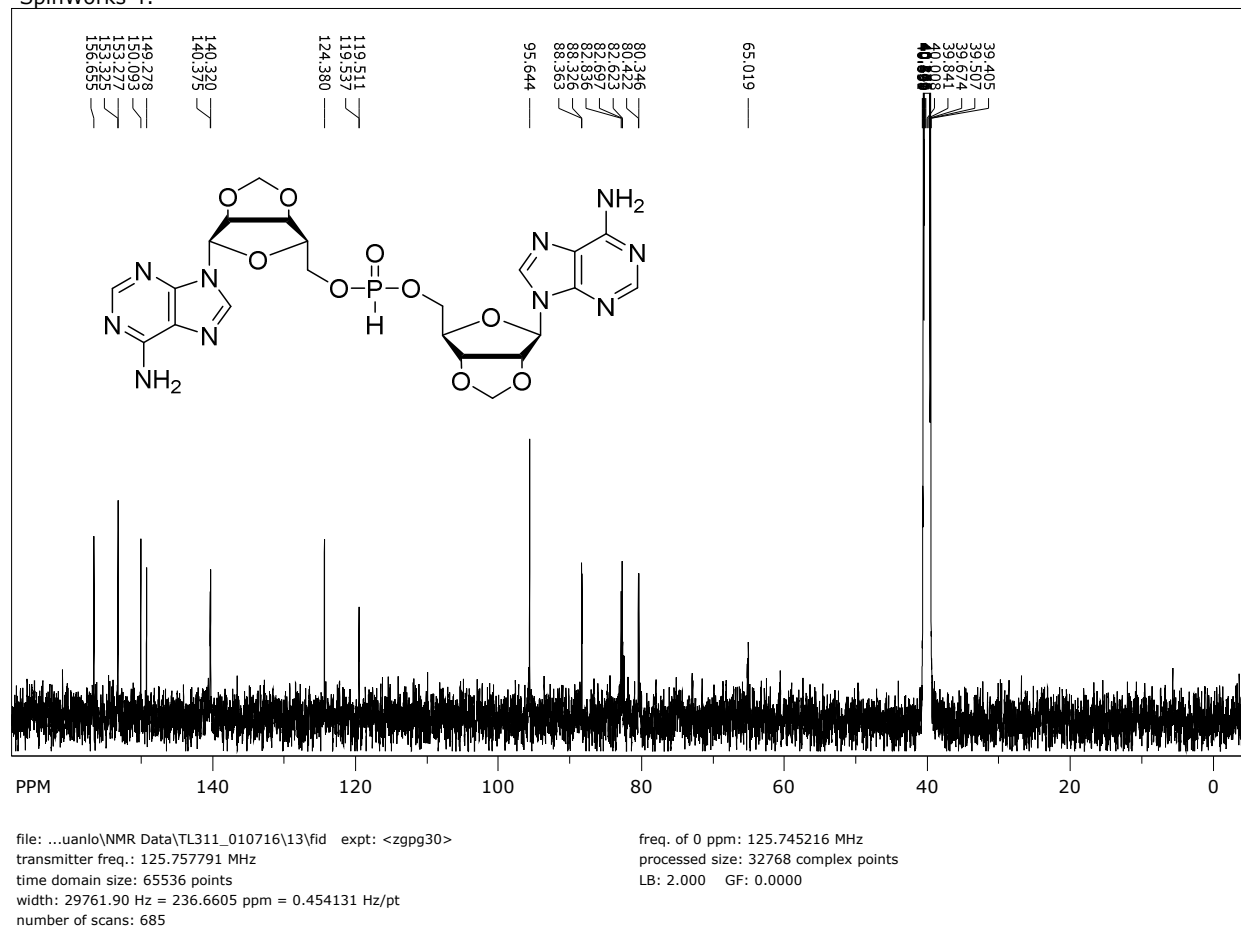

**Figure S2**  $^{13}\text{C}$  NMR spectrum of bis(2',3'-O-methyleneadenosin-5'-yl)-H-phosphonate (**1h**)

SpinWorks 4:

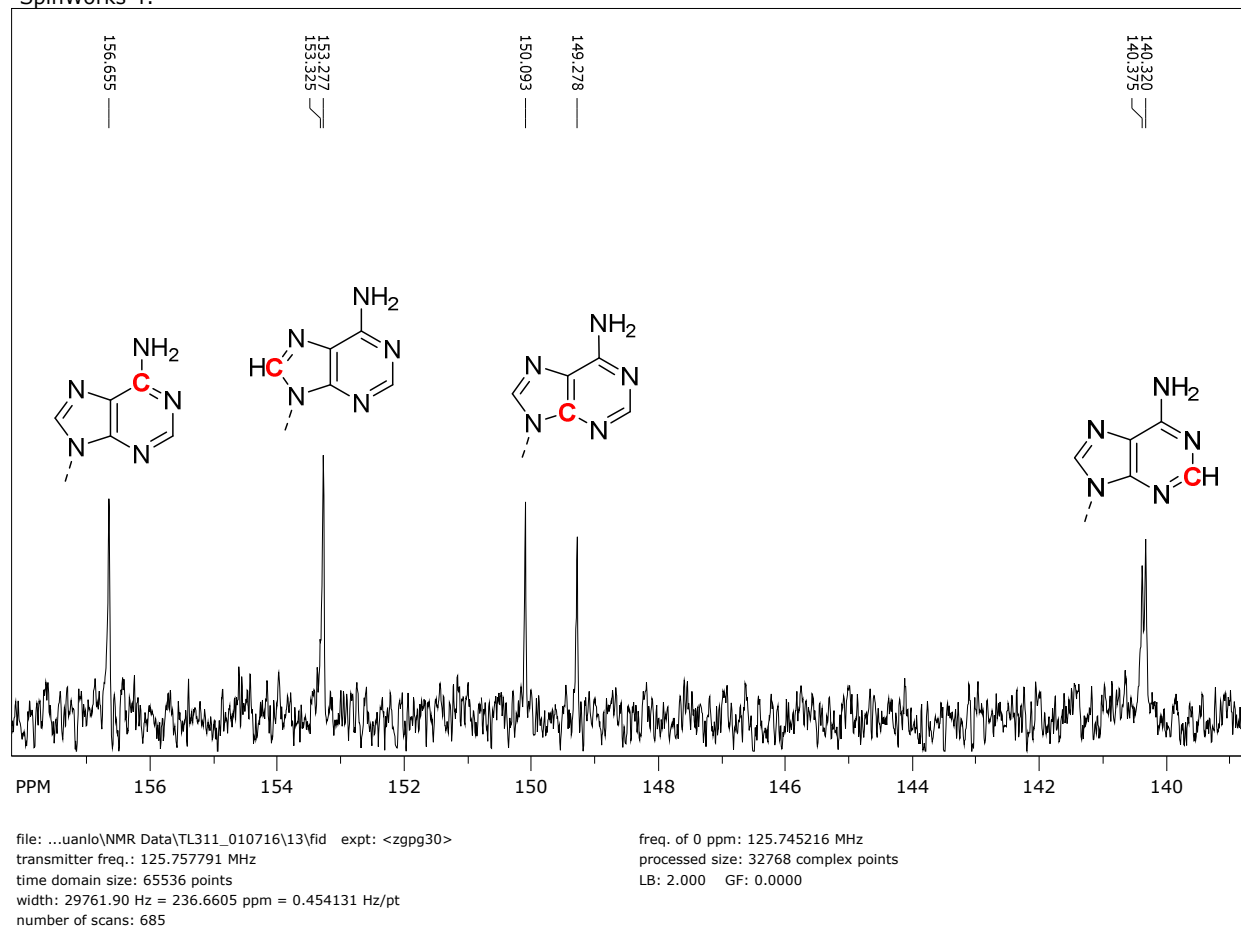

Figure S2  $^{13}\text{C}$  NMR spectrum of bis(2',3'-O-methyleneadenosin-5'-yl)-H-phosphonate (**1h**) (continued)

SpinWorks 4:

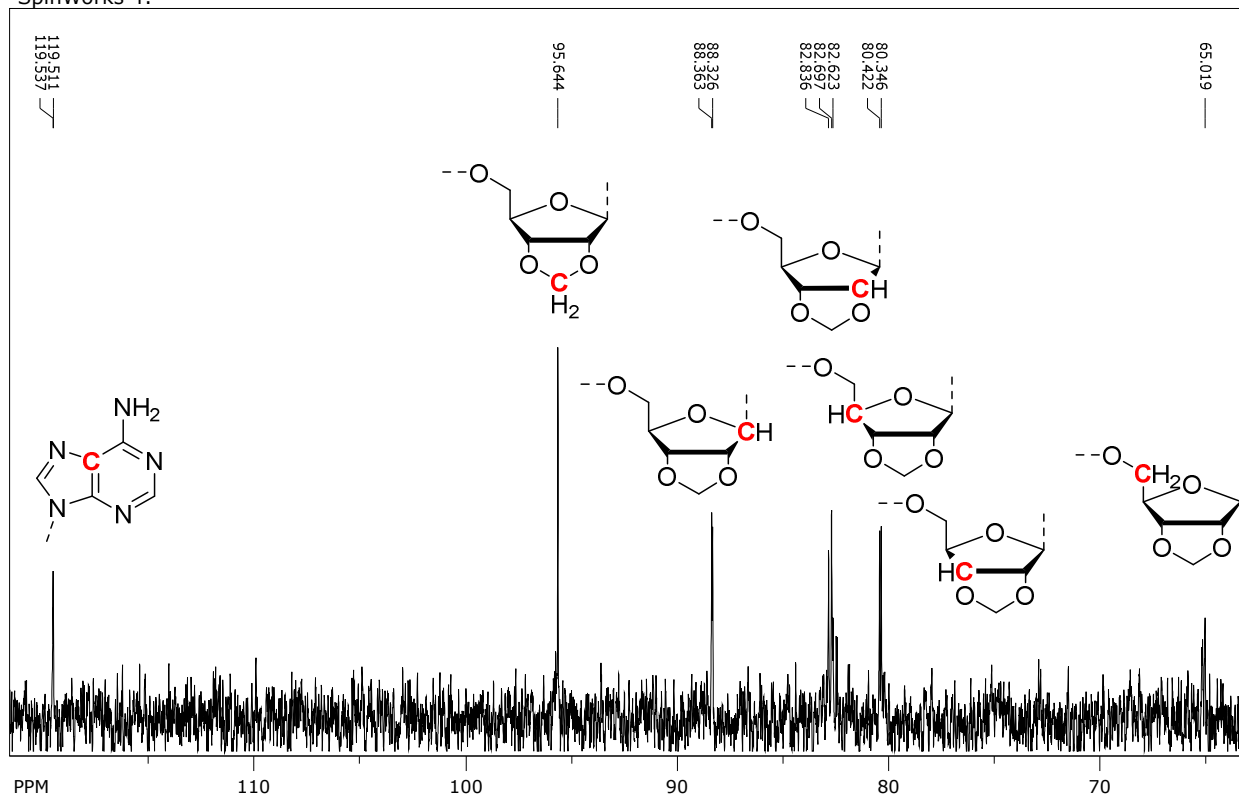

file: ...uanlo\NMR Data\TL311\_010716\13\fid exp: <zpgg30>  
transmitter freq.: 125.757791 MHz  
time domain size: 65536 points  
width: 29761.90 Hz = 236.6605 ppm = 0.454131 Hz/pt  
number of scans: 685

freq. of 0 ppm: 125.745216 MHz  
processed size: 32768 complex points  
LB: 2.000 GF: 0.0000

Figure S2  $^{13}\text{C}$  NMR spectrum of bis(2',3'-O-methyleneadenosin-5'-yl)-H-phosphonate (1h) (continued)



SpinWorks 4:

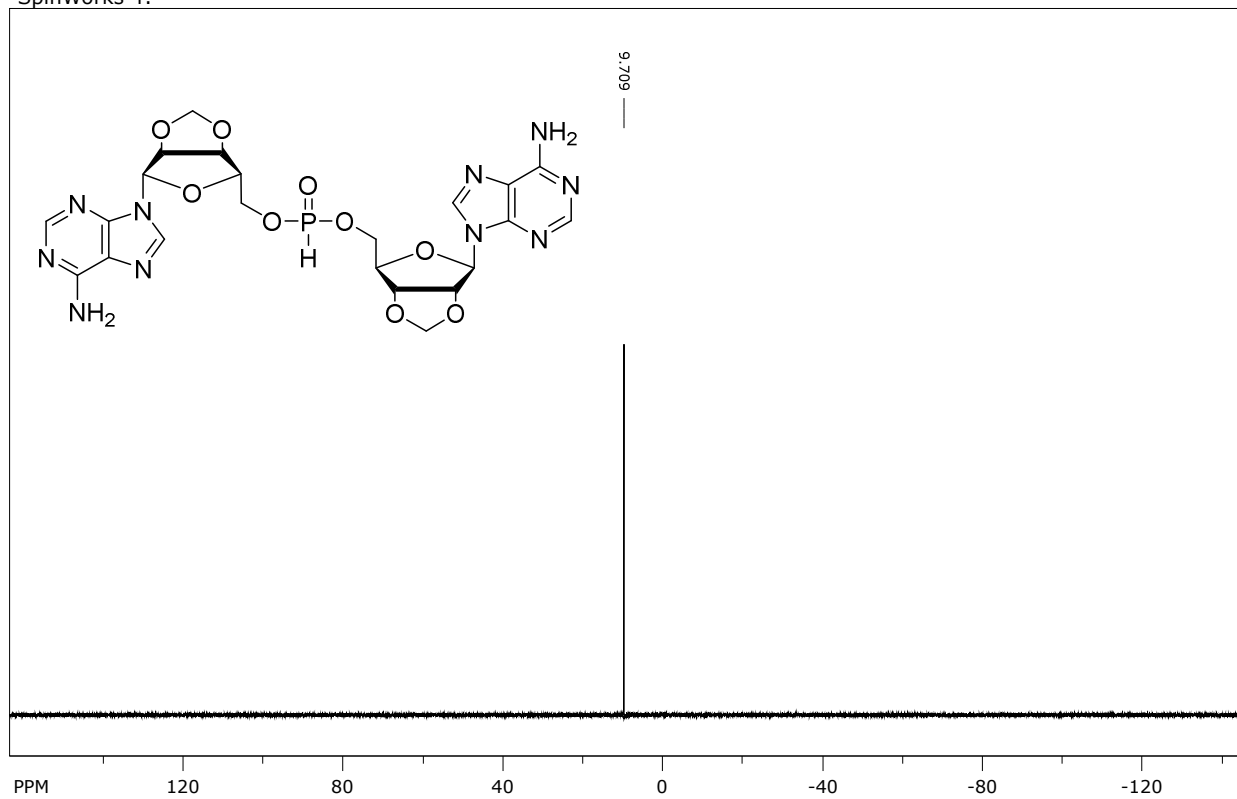

file: ...uanlo\NMR Data\TL311\_010716\31\fid exp: <zggp30>  
transmitter freq.: 202.436095 MHz  
time domain size: 65536 points  
width: 81521.74 Hz = 402.7036 ppm = 1.243923 Hz/pt  
number of scans: 128

freq. of 0 ppm: 202.436095 MHz  
processed size: 32768 complex points  
LB: 0.000 GF: 0.0000

**Figure S3** <sup>31</sup>P NMR spectrum of bis(2',3'-O-methyleneadenosin-5'-yl)-H-phosphonate (**1h**)

SpinWorks 4:

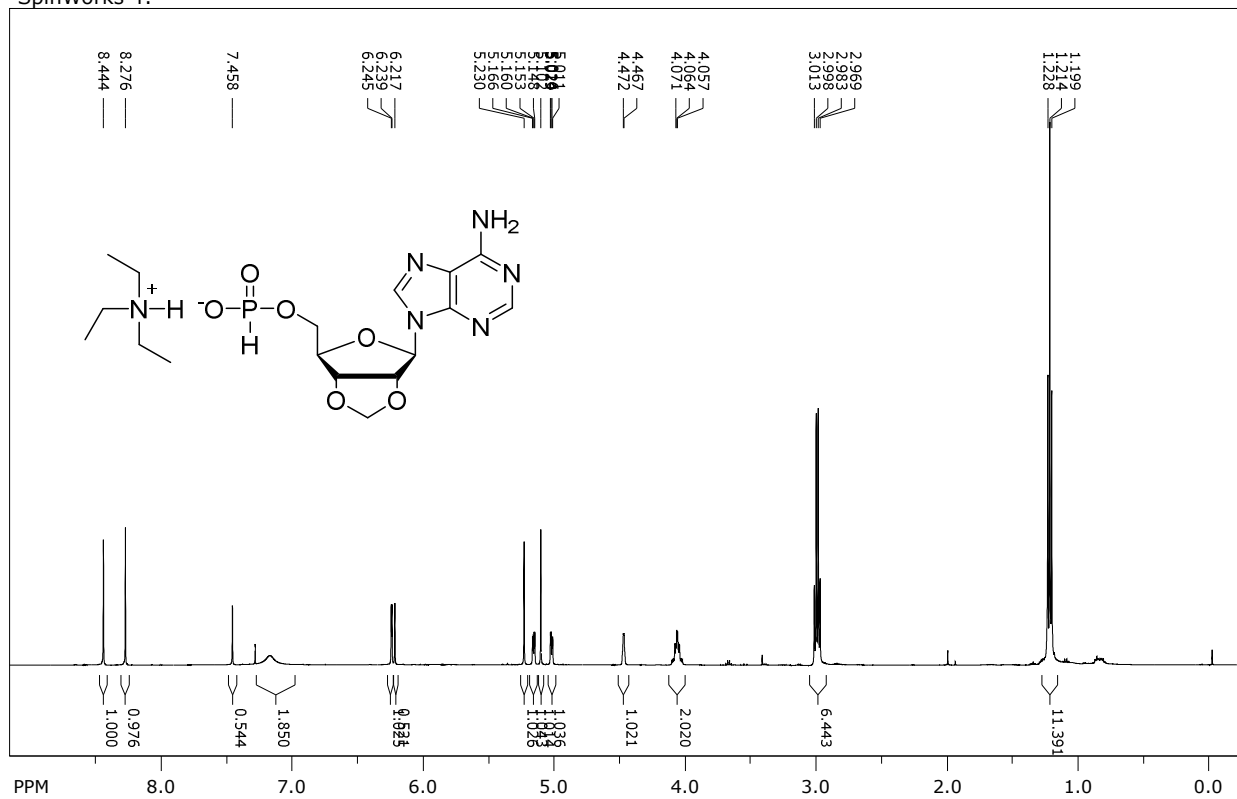

file: ...tuanio\NMR Data\TL316\_260916\1\fid expt: <zg30>  
 transmitter freq.: 500.083088 MHz  
 time domain size: 65536 points  
 width: 10000.00 Hz = 19.9967 ppm = 0.152588 Hz/pt  
 number of scans: 16

freq. of 0 ppm: 500.080000 MHz  
 processed size: 65536 complex points  
 LB: 0.300 GF: 0.0000

**Figure S4** <sup>1</sup>H NMR spectrum of 2',3'-O-methyleneadenosine-5'-H-phosphonate (**3h**)

SpinWorks 4:

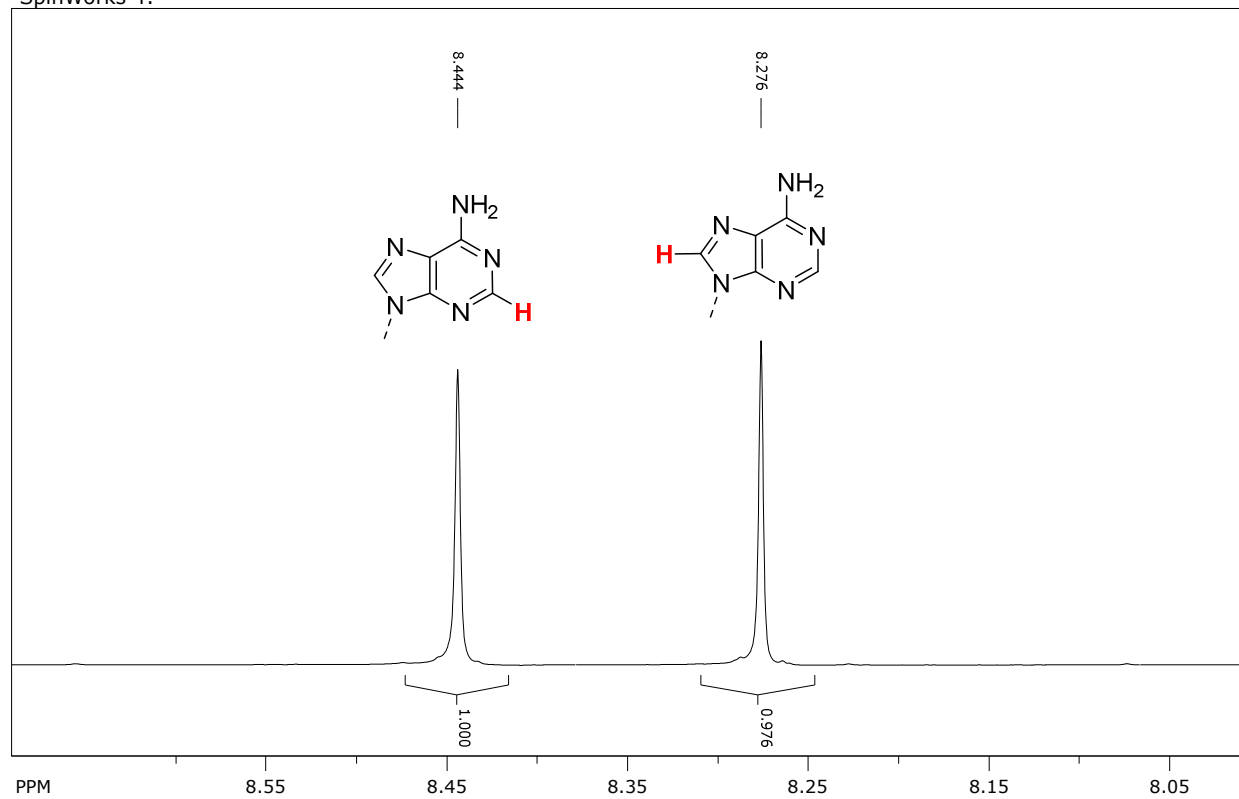

file: ...tuanio\NMR Data\TL316\_260916\1\fid expt: <zg30>  
transmitter freq.: 500.083088 MHz  
time domain size: 65536 points  
width: 10000.00 Hz = 19.9967 ppm = 0.152588 Hz/pt  
number of scans: 16

freq. of 0 ppm: 500.080000 MHz  
processed size: 65536 complex points  
LB: 0.300 GF: 0.0000

**Figure S4** <sup>1</sup>H NMR spectrum of 2',3'-O-methyleneadenosine-5'-H-phosphonate (**3h**) (continued)

SpinWorks 4:

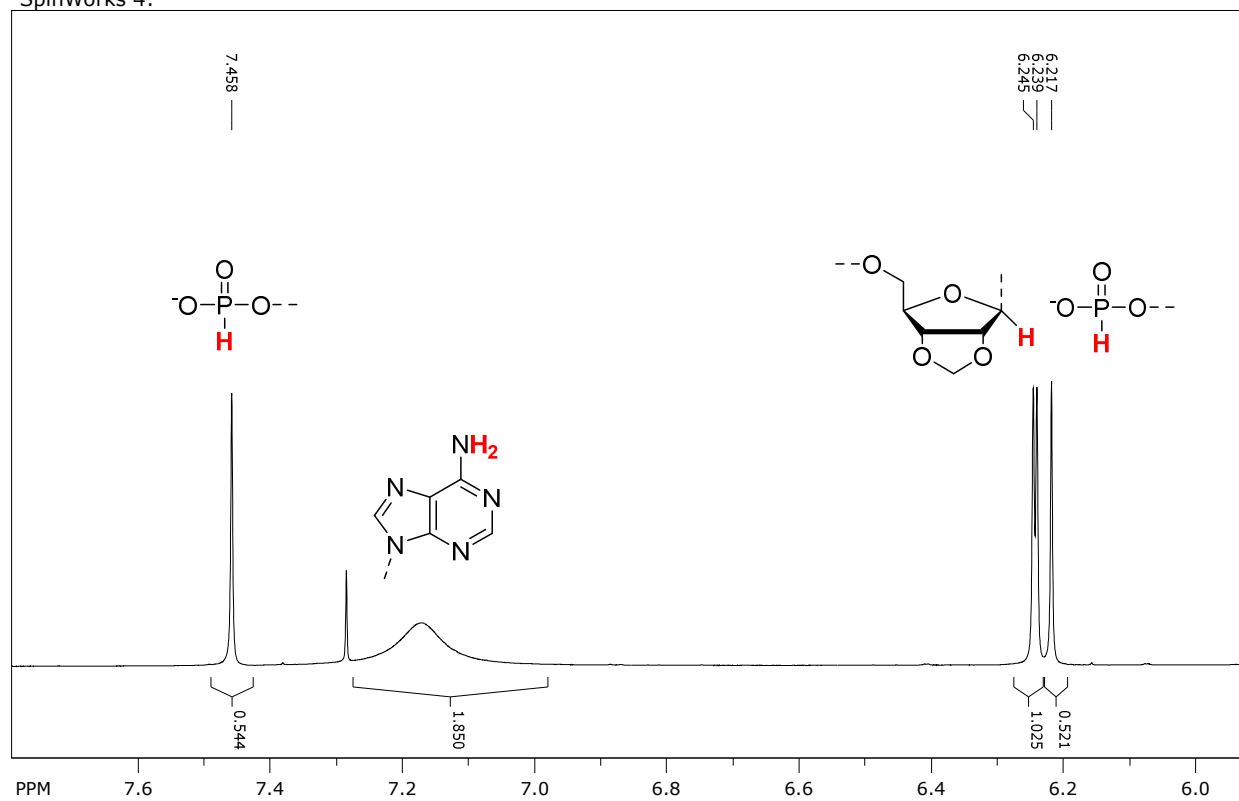

file: ...tuanlo\NMR Data\TL316\_260916\1\fid expt: <zg30>  
transmitter freq.: 500.083088 MHz  
time domain size: 65536 points  
width: 10000.00 Hz = 19.9967 ppm = 0.152588 Hz/pt  
number of scans: 16

freq. of 0 ppm: 500.080000 MHz  
processed size: 65536 complex points  
LB: 0.300 GF: 0.0000

**Figure S4** <sup>1</sup>H NMR spectrum of 2',3'-O-methyleneadenosine-5'-H-phosphonate (**3h**) (continued)

SpinWorks 4:

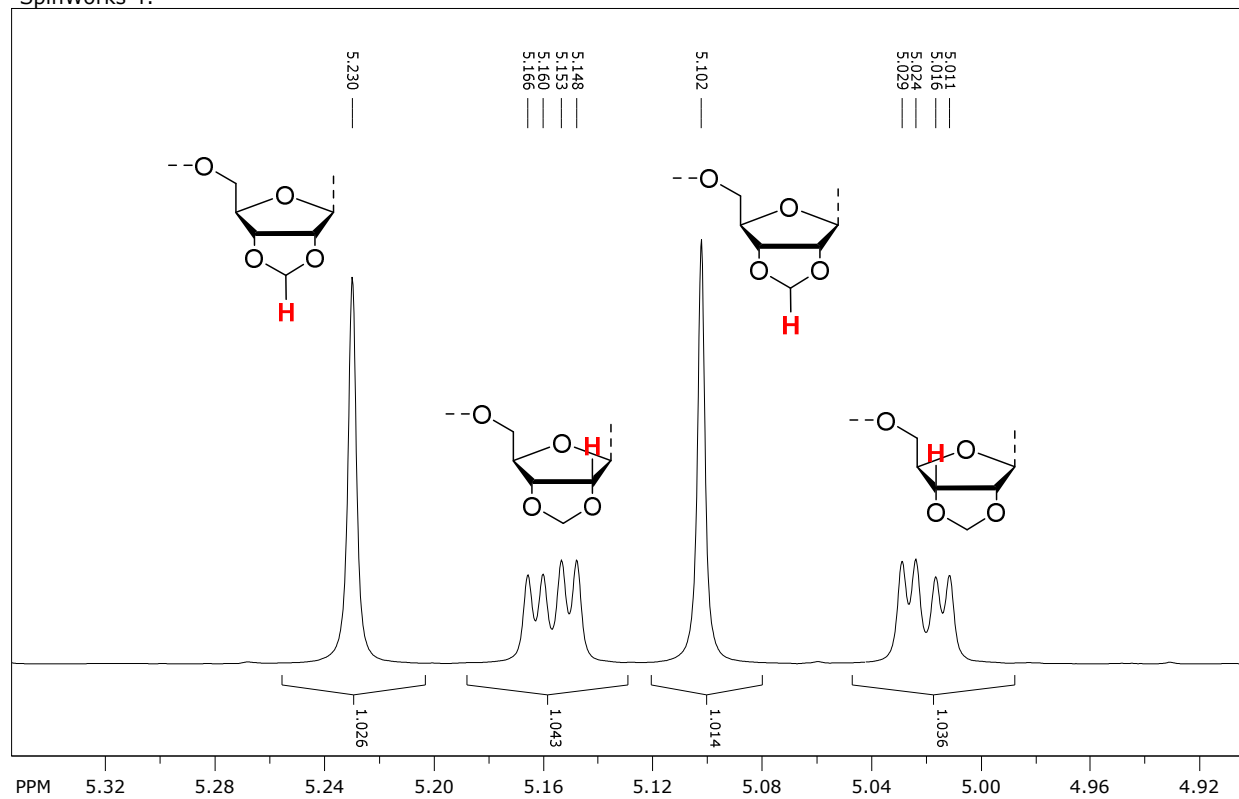

file: ...tuanio\NMR Data\TL316\_260916\1\fid exp: <zg30>  
transmitter freq.: 500.083088 MHz  
time domain size: 65536 points  
width: 10000.00 Hz = 19.9967 ppm = 0.152588 Hz/pt  
number of scans: 16

freq. of 0 ppm: 500.080000 MHz  
processed size: 65536 complex points  
LB: 0.300 GF: 0.0000

**Figure S4** <sup>1</sup>H NMR spectrum of 2',3'-O-methyleneadenosine-5'-H-phosphonate (**3h**) (continued)

SpinWorks 4:

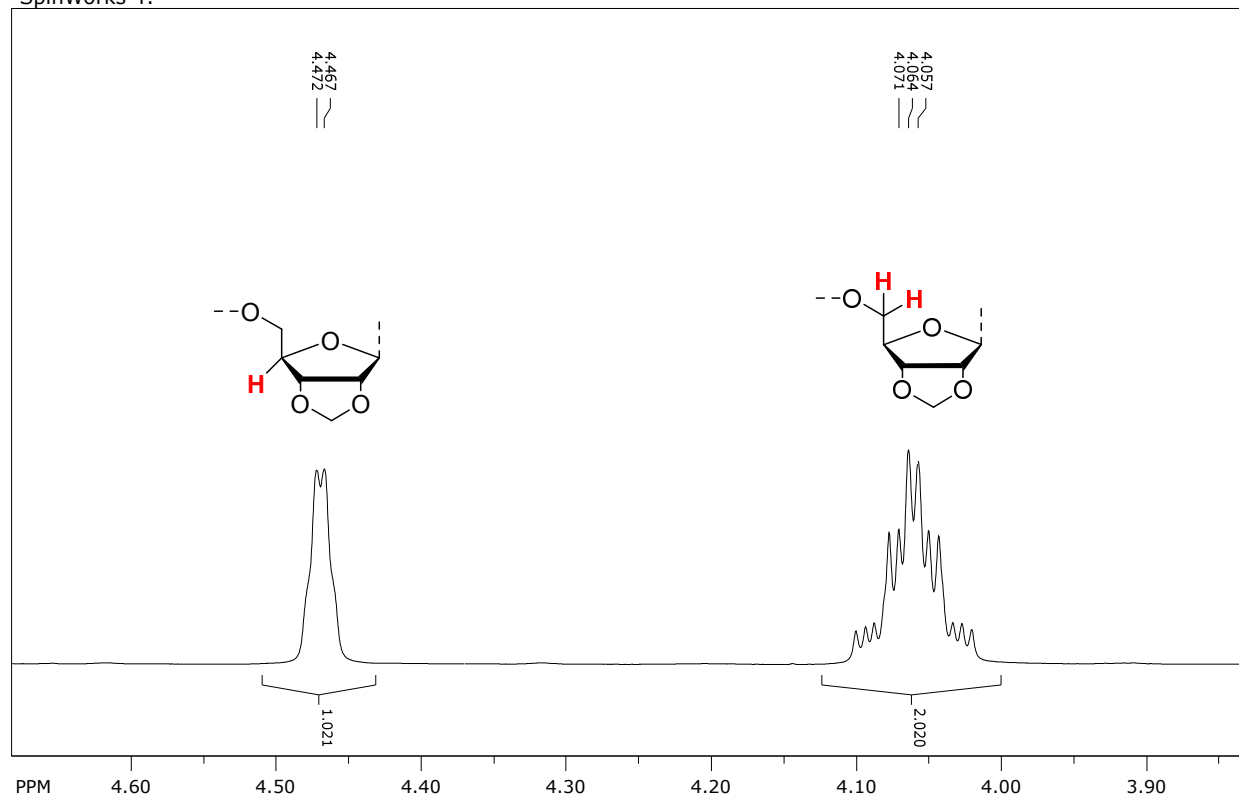

file: ...tuanlo\NMR Data\TL316\_260916\1\fid expt: <zg30>  
transmitter freq.: 500.083088 MHz  
time domain size: 65536 points  
width: 10000.00 Hz = 19.9967 ppm = 0.152588 Hz/pt  
number of scans: 16

freq. of 0 ppm: 500.080000 MHz  
processed size: 65536 complex points  
LB: 0.300 GF: 0.0000

**Figure S4** <sup>1</sup>H NMR spectrum of 2',3'-O-methyleneadenosine-5'-H-phosphonate (**3h**) (continued)

SpinWorks 4:

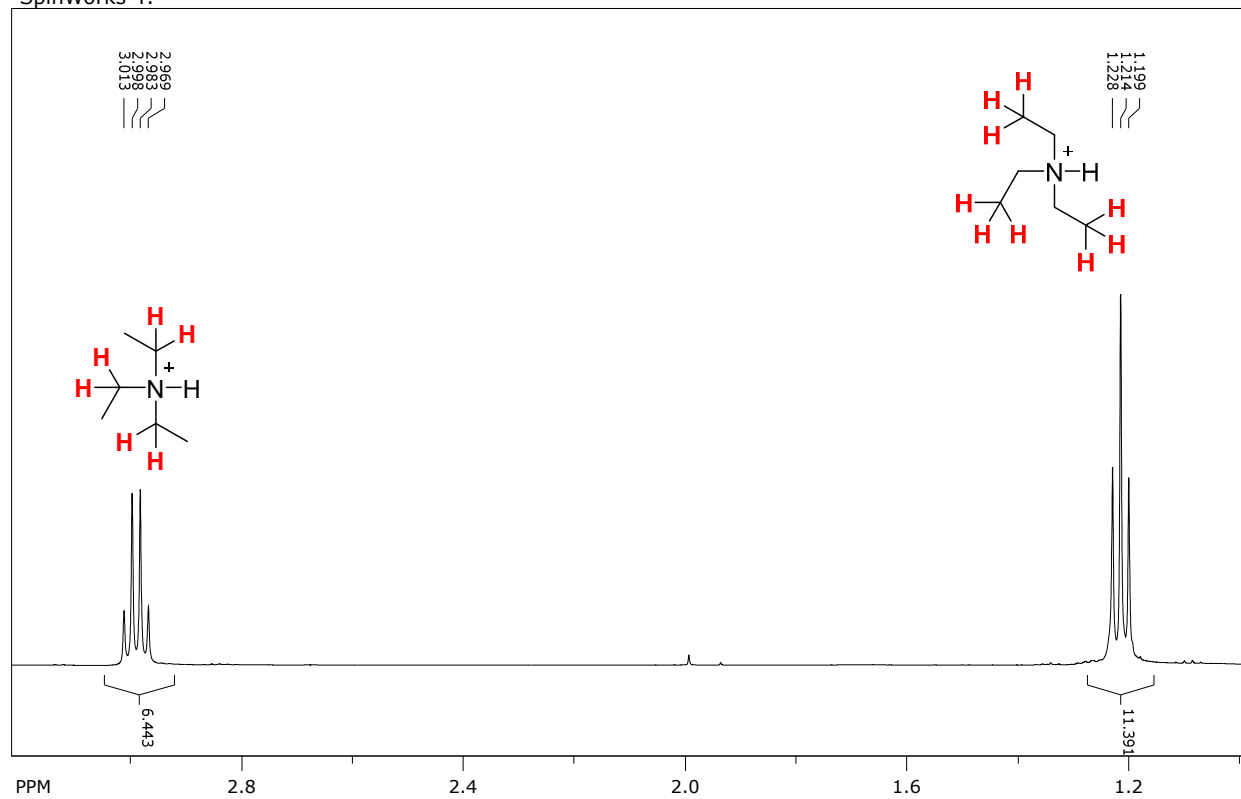

file: ...tuanlo\NMR Data\TL316\_260916\1\fid expt: <zg30>  
transmitter freq.: 500.083088 MHz  
time domain size: 65536 points  
width: 10000.00 Hz = 19.9967 ppm = 0.152588 Hz/pt  
number of scans: 16

freq. of 0 ppm: 500.080000 MHz  
processed size: 65536 complex points  
LB: 0.300 GF: 0.0000

**Figure S4** <sup>1</sup>H NMR spectrum of 2',3'-O-methyleneadenosine-5'-H-phosphonate (**3h**) (continued)

SpinWorks 4:

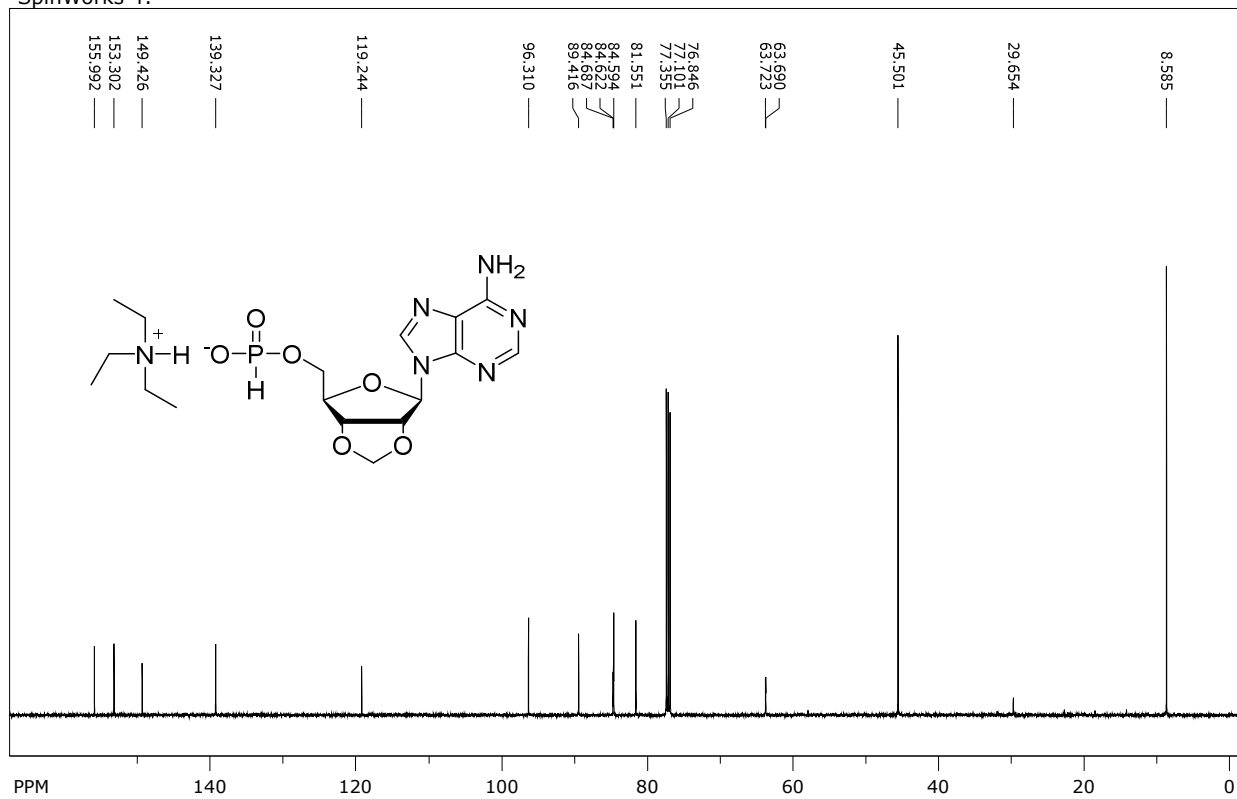

file: ...uanlo\NMR Data\TL316\_260916\13\fid exp: <zggp30>  
transmitter freq.: 125.757791 MHz  
time domain size: 65536 points  
width: 29761.90 Hz = 236.6605 ppm = 0.454131 Hz/pt  
number of scans: 491

freq. of 0 ppm: 125.745216 MHz  
processed size: 32768 complex points  
LB: 1.000 GF: 0.0000

**Figure S5**  $^{13}\text{C}$  NMR spectrum of 2',3'-O-methyleneadenosine-5'-H-phosphonate (**3h**)



SpinWorks 4:

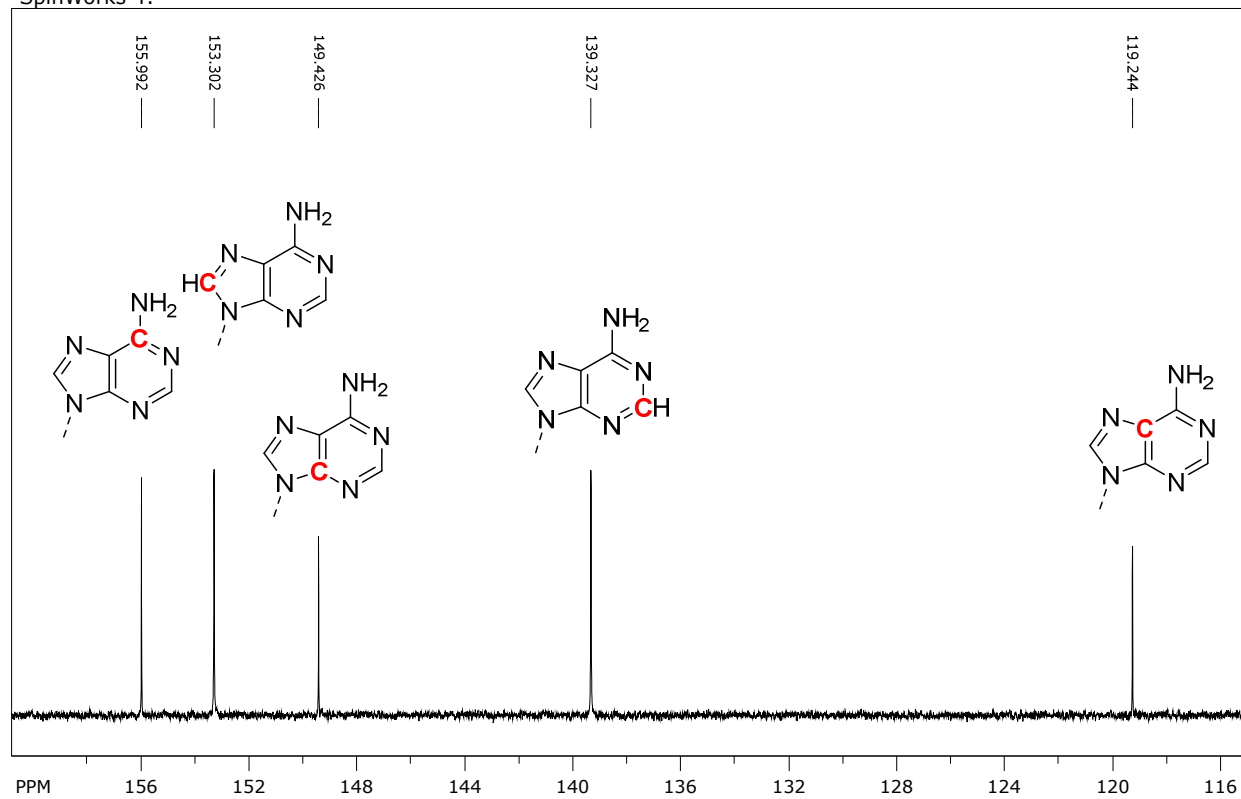

file: ...uanlo\NMR Data\TL316\_260916\13\fid exp: <zpgg30>  
transmitter freq.: 125.757791 MHz  
time domain size: 65536 points  
width: 29761.90 Hz = 236.6605 ppm = 0.454131 Hz/pt  
number of scans: 491

freq. of 0 ppm: 125.745216 MHz  
processed size: 32768 complex points  
LB: 1.000 GF: 0.0000

Figure S5  $^{13}\text{C}$  NMR spectrum of 2',3'-O-methyleneadenosine-5'-H-phosphonate (3h) (continued)

SpinWorks 4:

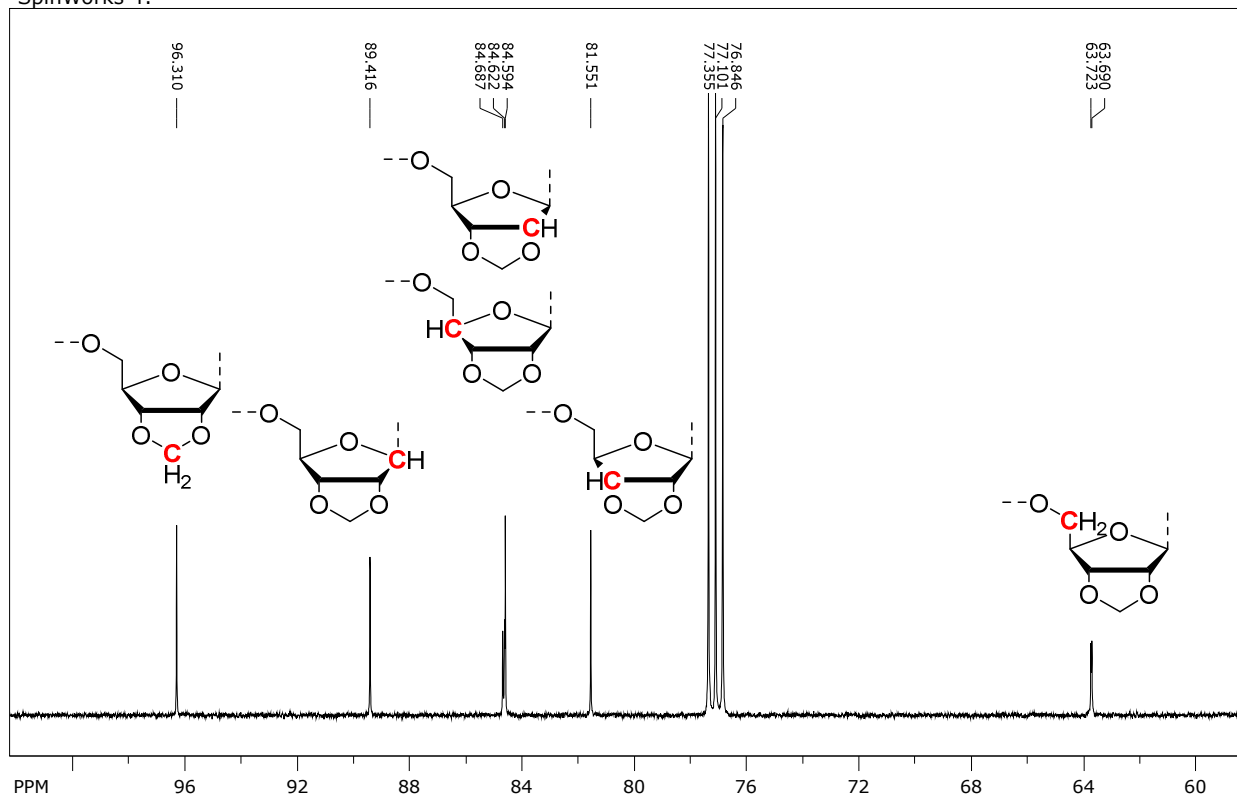

file: ...uanlo\NMR Data\TL316\_260916\13\fid exp: <zggg30>  
transmitter freq.: 125.757791 MHz  
time domain size: 65536 points  
width: 29761.90 Hz = 236.6605 ppm = 0.454131 Hz/pt  
number of scans: 491

freq. of 0 ppm: 125.745216 MHz  
processed size: 32768 complex points  
LB: 1.000 GF: 0.0000

Figure S5  $^{13}\text{C}$  NMR spectrum of 2',3'-O-methyleneadenosine-5'-H-phosphonate (**3h**) (continued)

SpinWorks 4:

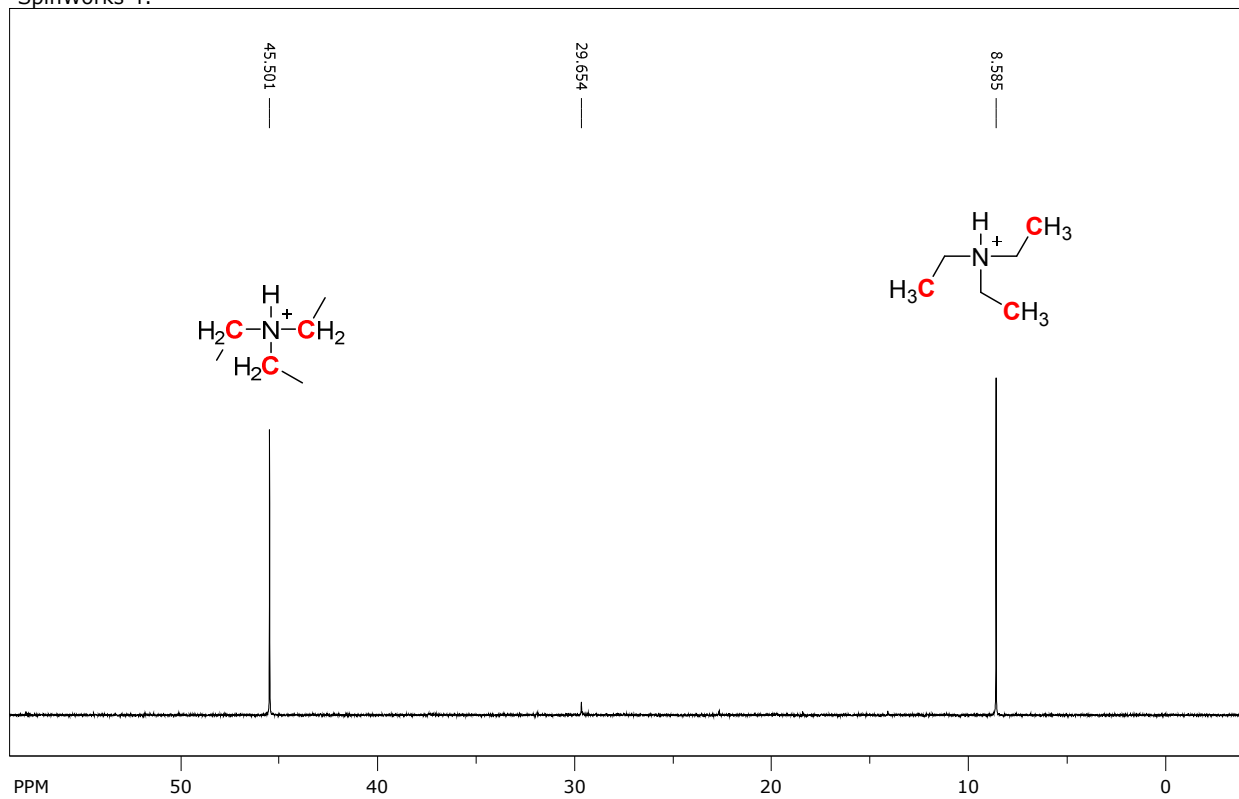

file: ...uanlo\NMR Data\TL316\_260916\13\fid exp: <zggp30>  
transmitter freq.: 125.757791 MHz  
time domain size: 65536 points  
width: 29761.90 Hz = 236.6605 ppm = 0.454131 Hz/pt  
number of scans: 491

freq. of 0 ppm: 125.745216 MHz  
processed size: 32768 complex points  
LB: 1.000 GF: 0.0000

Figure S5 <sup>13</sup>C NMR spectrum of 2',3'-O-methyleneadenosine-5'-H-phosphonate (**3h**) (continued)

SpinWorks 4:

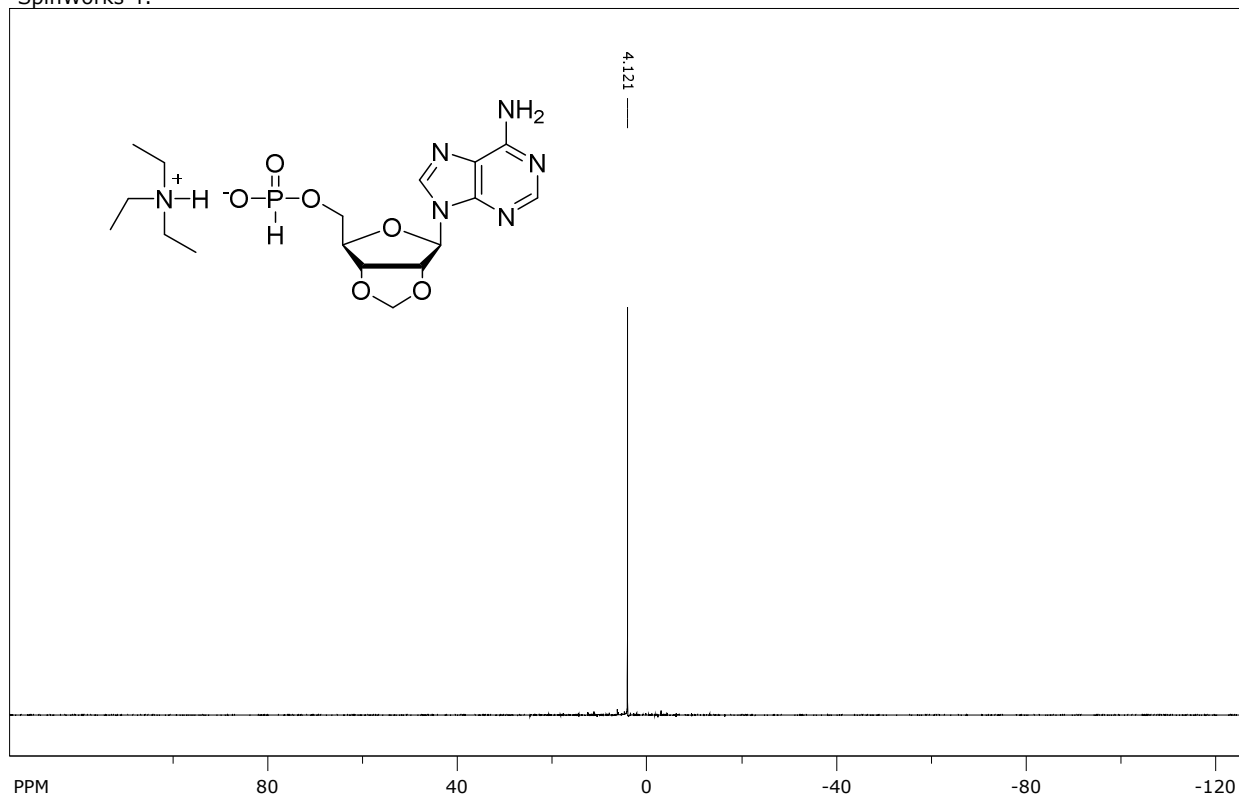

file: ...uanlo\NMR Data\TL316\_260916\31\fid exp: <zggg30>  
transmitter freq.: 202.425973 MHz  
time domain size: 65536 points  
width: 81521.74 Hz = 402.7237 ppm = 1.243923 Hz/pt  
number of scans: 256

freq. of 0 ppm: 202.436095 MHz  
processed size: 32768 complex points  
LB: 1.000 GF: 0.0000

**Figure S6**  $^{31}\text{P}$  NMR spectrum of 2',3'-O-methyleneadenosine-5'-H-phosphonate (**3h**)

**Table S1** Observed rate constants for the hydrolysis of **1h** in the presence of 3.0 mg of sublimed elemental sulfur;  $T = 60\text{ }^\circ\text{C}$ ,  $I(\text{NaCl}) = 1.0\text{ M}$ .

| pH   | $k_{\text{obs}} / 10^{-4}\text{ s}^{-1}$ |                   |                  |                            |                          | $\log(k_{\text{obs}} / \text{s}^{-1})$ |
|------|------------------------------------------|-------------------|------------------|----------------------------|--------------------------|----------------------------------------|
|      | [buffer] = 200 mM                        | [buffer] = 100 mM | [buffer] = 50 mM | [buffer] = 20 mM           | [buffer] = 0 mM          |                                        |
| 0.52 | n/a <sup>a</sup>                         | n/a <sup>a</sup>  | n/a <sup>a</sup> | n/a <sup>a</sup>           | 44 ± 2                   | -2.35                                  |
| 1.00 | n/a <sup>a</sup>                         | n/a <sup>a</sup>  | n/a <sup>a</sup> | n/a <sup>a</sup>           | 14.5 ± 0.5               | -2.84                                  |
| 1.52 | n/a <sup>a</sup>                         | n/a <sup>a</sup>  | n/a <sup>a</sup> | n/a <sup>a</sup>           | 5.4 ± 0.1                | -3.27                                  |
| 2.00 | n/a <sup>a</sup>                         | n/a <sup>a</sup>  | n/a <sup>a</sup> | n/a <sup>a</sup>           | 2.79 ± 0.03              | -3.55                                  |
| 2.52 | n/a <sup>a</sup>                         | n/a <sup>a</sup>  | n/a <sup>a</sup> | n/a <sup>a</sup>           | 1.39 ± 0.03              | -3.86                                  |
| 3.07 | 1.46 ± 0.03                              | 1.35 ± 0.03       | 1.22 ± 0.03      | 1.24 ± 0.04                | 1.19 ± 0.03 <sup>b</sup> | -3.92                                  |
| 3.55 | 1.32 ± 0.02                              | 1.36 ± 0.05       | 1.22 ± 0.05      | 1.17 ± 0.05                | 1.2 ± 0.1 <sup>b</sup>   | -3.92                                  |
| 4.08 | 1.81 ± 0.05                              | 1.76 ± 0.04       | 1.68 ± 0.04      | 1.35 ± 0.05                | 1.5 ± 0.1 <sup>b</sup>   | -3.82                                  |
| 4.56 | 2.39 ± 0.04                              | 2.1 ± 0.2         | 2.14 ± 0.03      | 1.86 ± 0.02                | 1.9 ± 0.1 <sup>b</sup>   | -3.72                                  |
| 5.03 | 3.5 ± 0.2                                | 3.84 ± 0.08       | 3.8 ± 0.2        | (1.59 ± 0.08) <sup>c</sup> | 3.7 ± 0.2 <sup>b</sup>   | -3.43                                  |
| 5.82 | 10.2 ± 0.1                               | 9.0 ± 0.5         | 8.2 ± 0.3        | 11 ± 1                     | 10 ± 1 <sup>d</sup>      | -3.02                                  |
| 6.30 | 24.7 ± 0.9                               | 22 ± 1            | 25 ± 2           | 22 ± 3                     | 23 ± 3 <sup>d</sup>      | -2.64                                  |
| 6.78 | 53 ± 8                                   | 53 ± 3            | 60 ± 1           | 60 ± 1                     | 56 ± 4 <sup>d</sup>      | -2.25                                  |
| 7.25 | 170 ± 30                                 | 170 ± 10          | 170 ± 10         | 220 ± 20                   | 170 ± 20 <sup>d</sup>    | -1.77                                  |

<sup>a</sup> Kinetic runs at pH < 3 were carried out in aq. HCl, rather than buffer. <sup>b</sup> Linear extrapolation of values obtained at 20, 50, 100 and 200 mM buffer. <sup>c</sup> Excluded as an outlier. <sup>d</sup> Average of values obtained at 20, 50, 100 and 200 mM buffer.

**Table S2** Observed rate constants for the sulfurization of **1h** in the presence of 3.0 mg of sublimed elemental sulfur;  $T = 60\text{ }^{\circ}\text{C}$ ,  $I(\text{NaCl}) = 1.0\text{ M}$ .

| pH   | $k_{\text{obs}} / 10^{-4}\text{ s}^{-1}$ |                            |                              |                            |                          | $\log(k_{\text{obs}} / \text{s}^{-1})$ |
|------|------------------------------------------|----------------------------|------------------------------|----------------------------|--------------------------|----------------------------------------|
|      | [buffer] = 200 mM                        | [buffer] = 100 mM          | [buffer] = 50 mM             | [buffer] = 20 mM           | [buffer] = 0 mM          |                                        |
| 0.52 | n/a <sup>a</sup>                         | n/a <sup>a</sup>           | n/a <sup>a</sup>             | n/a <sup>a</sup>           | n/a <sup>b</sup>         | n/a <sup>b</sup>                       |
| 1.00 | n/a <sup>a</sup>                         | n/a <sup>a</sup>           | n/a <sup>a</sup>             | n/a <sup>a</sup>           | n/a <sup>b</sup>         | n/a <sup>b</sup>                       |
| 1.52 | n/a <sup>a</sup>                         | n/a <sup>a</sup>           | n/a <sup>a</sup>             | n/a <sup>a</sup>           | 0.0140 ± 0.0002          | -5.85                                  |
| 2.00 | n/a <sup>a</sup>                         | n/a <sup>a</sup>           | n/a <sup>a</sup>             | n/a <sup>a</sup>           | 0.0337 ± 0.0003          | -5.47                                  |
| 2.52 | n/a <sup>a</sup>                         | n/a <sup>a</sup>           | n/a <sup>a</sup>             | n/a <sup>a</sup>           | 0.110 ± 0.002            | -4.96                                  |
| 3.07 | 0.140 ± 0.003                            | 0.161 ± 0.003              | (0.068 ± 0.002) <sup>c</sup> | 0.189 ± 0.006              | 0.16 ± 0.02 <sup>d</sup> | -4.80                                  |
| 3.55 | 0.337 ± 0.004                            | 0.218 ± 0.008              | 0.184 ± 0.007                | (0.94 ± 0.04) <sup>c</sup> | 0.25 ± 0.07 <sup>d</sup> | -4.60                                  |
| 4.08 | (0.090 ± 0.003) <sup>c</sup>             | 0.42 ± 0.01                | 0.43 ± 0.01                  | 0.60 ± 0.02                | 0.49 ± 0.08 <sup>d</sup> | -4.31                                  |
| 4.56 | 0.86 ± 0.01                              | 1.02 ± 0.08                | (0.38 ± 0.06) <sup>c</sup>   | 1.31 ± 0.07                | 1.1 ± 0.2 <sup>d</sup>   | -3.96                                  |
| 5.03 | 1.63 ± 0.07                              | (0.70 ± 0.01) <sup>c</sup> | 2.1 ± 0.1                    | 1.53 ± 0.08                | 1.7 ± 0.2 <sup>d</sup>   | -3.77                                  |
| 5.82 | 2.27 ± 0.03                              | 3.4 ± 0.2                  | 3.6 ± 0.1                    | 5.4 ± 0.5                  | 4 ± 1 <sup>d</sup>       | -3.40                                  |
| 6.30 | 2.59 ± 0.04                              | (1.6 ± 0.2) <sup>c</sup>   | 7.3 ± 0.3                    | 5.9 ± 0.2                  | 5 ± 2 <sup>d</sup>       | -3.30                                  |
| 6.78 | 7 ± 1                                    | 9.3 ± 0.8                  | (4.2 ± 0.1) <sup>c</sup>     | 9.8 ± 0.2                  | 9 ± 1 <sup>d</sup>       | -3.05                                  |
| 7.25 | 19 ± 4                                   | 17 ± 1                     | 53 ± 5                       | 60 ± 6                     | 40 ± 20 <sup>d</sup>     | -2.40                                  |

<sup>a</sup> Kinetic runs at pH < 3 were carried out in aq. HCl, rather than buffer. <sup>b</sup> Not detected owing to overwhelmingly faster hydrolysis. <sup>c</sup> Excluded as an outlier. <sup>d</sup> Average of values obtained at 20, 50, 100 and 200 mM buffer.
